# Supplementary material
Source: Springer Nature journal article supplement (https://www.springermedizin.de/resource/supplementary/12997_2011_68_MOESM2_ESM.pdf/9623254)

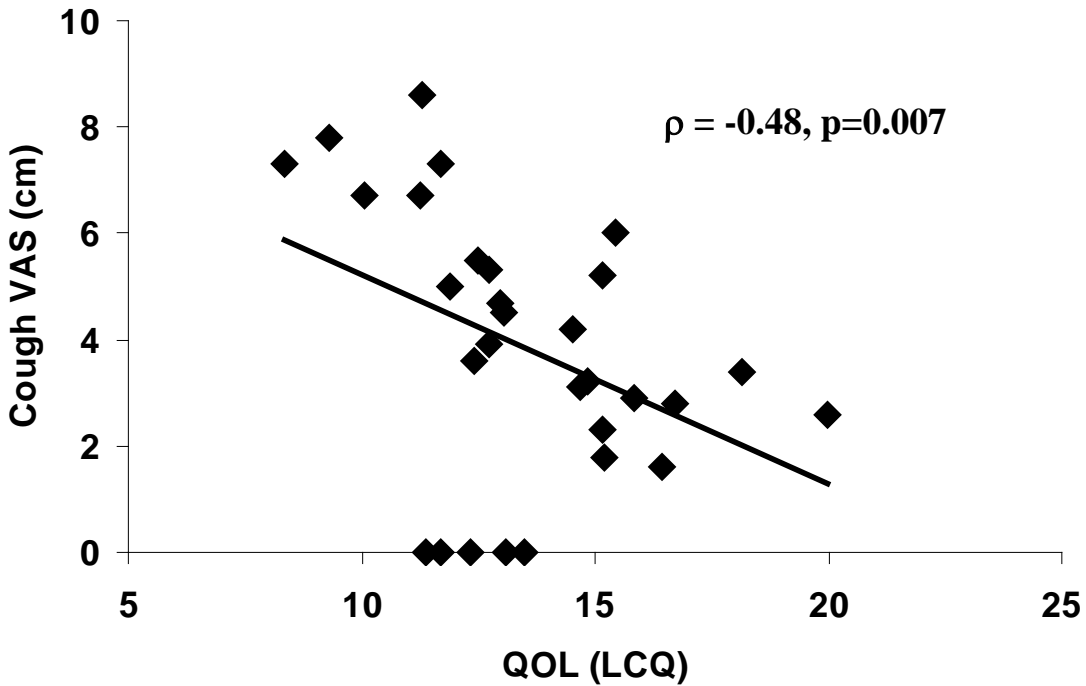

Supplement: MOESM2 [file 9623254]
